# Supplementary material for: Understanding WT1 Alterations and Expression Profiles in Hematological Malignancies
Source: MDPI journal article supplement (doi:10.3390/cancers15133491), 2023-07-04
Supplement: s1 [file s1]

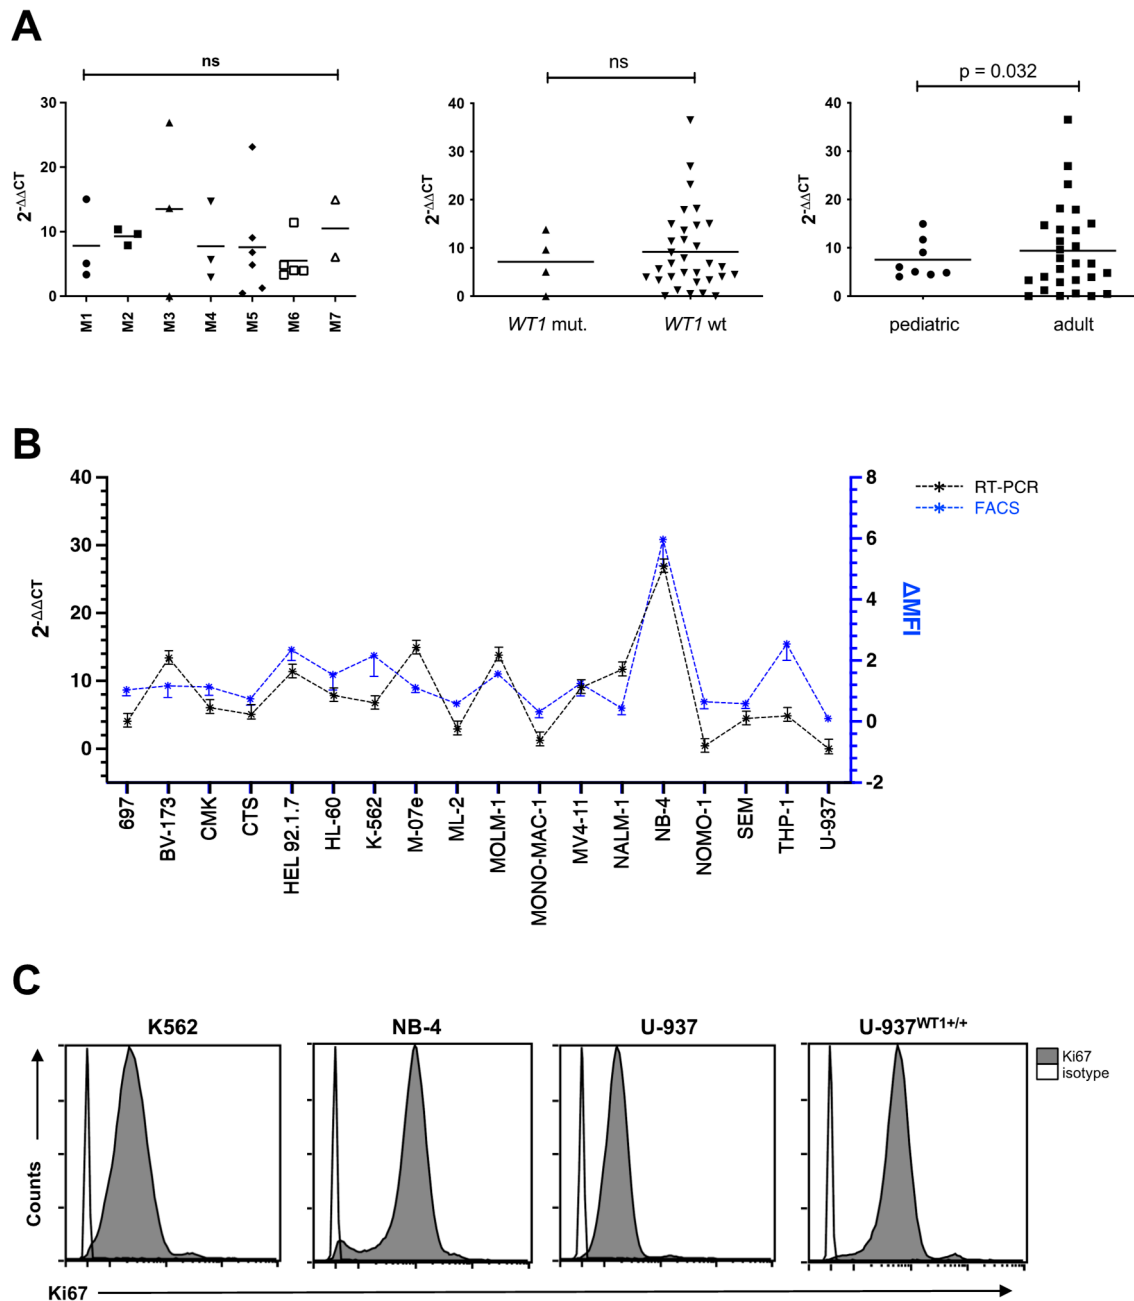

**Figure S1. Association of *WT1* mRNA expression with different leukemic features and its correlation with *WT1* protein.** (A) Total mRNA was extracted from different cell lines and reverse-transcribed into cDNA. The cDNA was used as template for RT-PCR in combination with selective primer pairs for *WT1* exon 2 and *ABL1*. *WT1*'s cycle threshold was normalized to *ABL1* ( $\Delta Ct$ ) and HEK293 cells ( $\Delta\Delta Ct$ ). The fold change expression normalized to that of detected in HEK293 cells was reported ( $2^{-\Delta\Delta Ct}$ ). The graph shows mean values  $\pm$  SD of three biological replicates. (B) Expression of *WT1* mRNA measured in panel A was compared to the expression of *WT1* protein measured as follows. One day after splitting cultures,  $1 \times 10^6$  cells per line were fixed and permeabilized using paraformaldehyde and methanol as described in the methods. The intracellular staining was performed for *WT1* antibody and its isotype control as well as Ki67 as a technical positive control (data for Ki67 not shown). Population's MFI was normalized to that of expressed in isotype control via subtraction ( $\Delta MFI = MFI_{WT1} - MFI_{isotype}$ ). The graph shows mean  $\pm$  SE of two to three biological replicates. (C) Histograms of four examples of cell lines delineating the percentage of the Ki67 intracellular protein. Here, the Ki67 staining was performed as a technical positive control for *WT1* flow cytometry as described in Figure 1. One day after splitting cultures,  $1 \times 10^6$  cells per line were fixed and permeabilized using paraformaldehyde and methanol as described in the methods. The intracellular staining was performed for Ki67 antibody and its isotype control. **Abbreviations:** *WT1*, Wilms Tumor 1; cDNA, complementary DNA; RT-PCR, real-time PCR; *ABL*, Abelson tyrosine-protein kinase; MFI, mean fluorescence intensity.

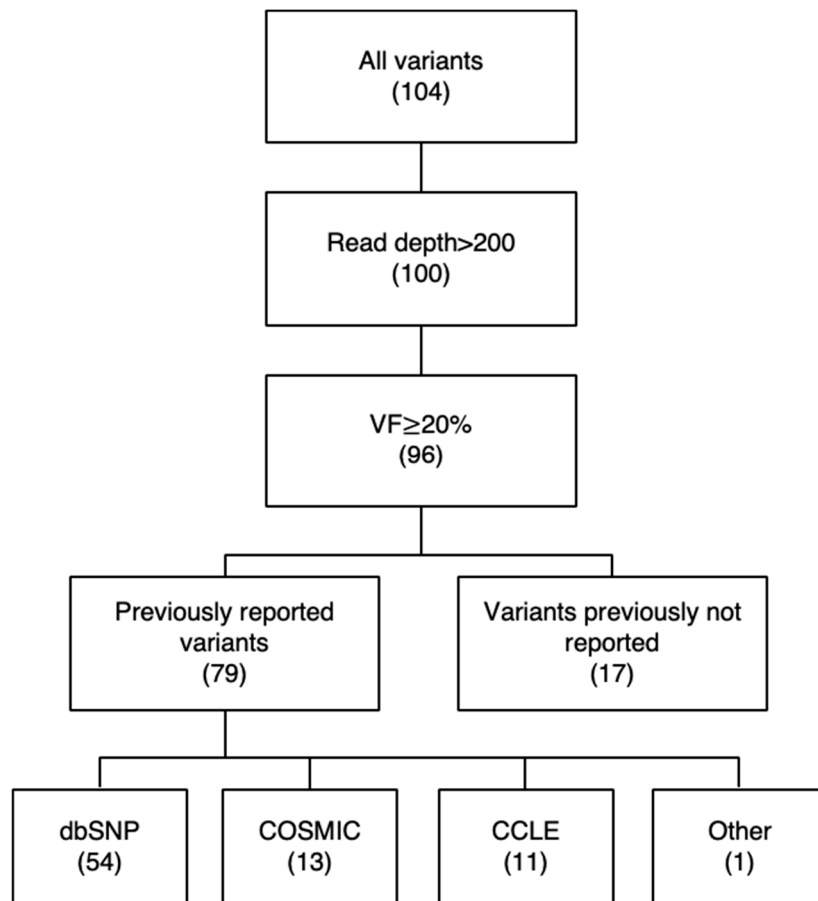

**Figure S2. Validation pipeline for variants detected via NGS.**

Abbreviations. VF, variant frequency; NGS, next generation sequencing. ClinVar (dbSNP) database accessed at <https://www.ncbi.nlm.nih.gov/clinvar>; COSMIC database accessed at <https://cancer.sanger.ac.uk/cosmic>; CCLE database accessed at <https://depmap.org>.

**Table S1. Overview of cell lines included in this data set and performed analyses for each.**

| #  | Cell line  | NGS | RT-PCR | Sanger | FC | FA | Disease  | Subtype       | Fusion transcripts <sup>1</sup>                                                                                                                                                                                                                               | Cell Origin | Source                        |
|----|------------|-----|--------|--------|----|----|----------|---------------|---------------------------------------------------------------------------------------------------------------------------------------------------------------------------------------------------------------------------------------------------------------|-------------|-------------------------------|
| 1  | 697        | -   | +      | -      | +  | +  | ALL      | B-ALL         | t(1;19) <i>TCF3::PBX1</i>                                                                                                                                                                                                                                     | Pediatric   | Cultivated cells <sup>2</sup> |
| 2  | AML-193    | +   | -      | -      | -  | -  | AML      | M5            | t(1;12) <i>RAP1B::RAP1A</i>                                                                                                                                                                                                                                   | Pediatric   | Cell pellet <sup>3</sup>      |
| 3  | AP-1060    | -   | +      | -      | -  | -  | AML      | M3            | t(15;17) <i>PML::RARA</i> , t(12;15) <i>ETV6::NTRK3</i>                                                                                                                                                                                                       | Adult       | Cell pellet                   |
| 4  | BJAB       | -   | -      | -      | +  | -  | Lymphoma | NHL (Burkitt) | t(11;17) <i>KMT2A::CLTC</i>                                                                                                                                                                                                                                   | Pediatric   | Cultivated cells              |
| 5  | BV-173     | -   | +      | -      | +  | +  | CML      | CML in BC     | t(9;22) <i>BCR::ABL1</i>                                                                                                                                                                                                                                      | Adult       | Cultivated cells              |
| 6  | CMK        | -   | +      | +      | +  | +  | AML      | M7            | t(18;17) <i>ADNP2::NSF</i> , t(12;1) <i>RAP1B::RAP1A</i>                                                                                                                                                                                                      | Pediatric   | Cultivated cells              |
| 7  | CTS        | +   | +      | +      | +  | +  | AML      | M1            | t(6;11) <i>KMT2A::AFDN</i>                                                                                                                                                                                                                                    | Pediatric   | Cultivated cells              |
| 8  | ELF-153    | +   | -      | -      | -  | -  | AML      | M7            | No record of fusion transcripts                                                                                                                                                                                                                               | Adult       | Cell pellet                   |
| 9  | F-36P      | -   | +      | -      | -  | -  | AML      | M6            | t(19;21) <i>ZNF625-ZNF20::MIR99AHG</i> ,<br>t(19;21) <i>ZNF625::MIR99AHG</i> ,<br>Inv(16) <i>ANKS3::SEPT12</i> ,<br>t(21;19) <i>MIR99AHG::PTBP1</i> ,<br>Inv(19) <i>EPS15L1::PALM3</i> , Inv(9) <i>DOCK8::RFX3-AS1</i> , t(21;19) <i>MIR99AHG::PTBP1</i>      | Adult       | Cell pellet                   |
| 10 | FKH-1      | +   | +      | +      | -  | -  | AML      | M4            | t(9;12) <i>ETV6::ABL1</i> , t(6;9) <i>DEK::NUP214</i>                                                                                                                                                                                                         | Adult       | Cell pellet                   |
| 11 | GF-D8      | +   | -      | -      | -  | -  | AML      | M1            | No record of fusion transcripts                                                                                                                                                                                                                               | Adult       | Cell pellet                   |
| 12 | Granta-519 | -   | -      | -      | +  | -  | Lymphoma | B-NHL         | t(8;11) <i>RPS17P14::RPS17</i>                                                                                                                                                                                                                                | Adult       | Cultivated cells              |
| 13 | HEL 92.1.7 | +   | +      | -      | +  | +  | AML      | M6            | Inv(19) <i>CDC37::IL27RA</i> ,<br>t(20;19) <i>TRPC4AP::ACSBG2</i> , Inv(1) <i>MTF2::DR1</i> ,<br>Inv(9) <i>FREM1::MPDZ</i> , t(20;19) <i>ITCH::CATSPERD</i> ,<br>Inv(20) <i>TTI1::TRPC4AP</i> ,<br>t(20;19) <i>RALGAPB::AP1M2</i> , Inv(2) <i>GTDC1::ZEB2</i> | Young adult | Cultivated cells              |
| 14 | HL-60      | +   | +      | +      | +  | +  | AML      | M2            | t(5;16) <i>CYFIP2::PLCG2</i>                                                                                                                                                                                                                                  | Young adult | Cultivated cells              |
| 15 | HNT-34     | -   | +      | -      | -  | -  | AML      | M4            | t(9;22) <i>BCR::ABL1</i>                                                                                                                                                                                                                                      | Adult       | Cell pellet                   |
| 16 | HT-93      | +   | +      | +      | -  | -  | AML      | M3            | t(15;17) <i>PML::RARA</i> , t(1;12) <i>ETV6-ABL2</i>                                                                                                                                                                                                          | Adult       | Cell pellet                   |
| 17 | K-562      | +   | +      | +      | +  | +  | CML      | CML in BC     | t(9;22) <i>BCR-ABL</i>                                                                                                                                                                                                                                        | Adult       | Cultivated cells              |
| 18 | KASUMI-6   | +   | +      | +      | -  | +  | AML      | M2            | Inv(13) <i>UPF3A::CDC16</i>                                                                                                                                                                                                                                   | Adult       | Cultivated cells              |
| 19 | KG-1       | +   | +      | +      | -  | -  | AML      | M6            | t(12;8) <i>FGFR1OP2::FGFR1</i>                                                                                                                                                                                                                                | Adult       | Cell pellet                   |
| 20 | KG-1a      | +   | -      | -      | -  | -  | AML      | M6            | t(12;8) <i>FGFR1OP2::FGFR1</i>                                                                                                                                                                                                                                | Adult       | Cell pellet                   |
| 21 | KMOE-2     | +   | -      | -      | -  | -  | AML      | M6            | No record of fusion transcripts                                                                                                                                                                                                                               | Pediatric   | Cell pellet                   |
| 22 | KU-812     | -   | -      | -      | +  | +  | CML      | CML in BC     | t(9;22) <i>BCR-ABL</i>                                                                                                                                                                                                                                        | Adult       | Cultivated cells              |
| 23 | LAMA-84    | -   | -      | -      | +  | +  | CML      | CML in BC     | t(9;22) <i>BCR-ABL</i>                                                                                                                                                                                                                                        | Young adult | Cultivated cells              |
| 24 | M-07e      | +   | +      | +      | +  | +  | AML      | M7            | Inv(16) <i>CBFA2T3::GLIS2</i> , t(2;19) <i>ANO7-DHDH</i> ,<br>t(9;2) <i>MELK::RAPGEF4</i>                                                                                                                                                                     | Pediatric   | Cultivated cells              |
| 25 | ME-1       | +   | -      | +      | +  | -  | AML      | M4Eo          | Inv(16) <i>CBFB::MYH11</i>                                                                                                                                                                                                                                    | Adult       | Cultivated cells              |
| 26 | Mino       | -   | -      | -      | +  | -  | Lymphoma | MCL           | t(11;14) <i>IGH::CCND1</i>                                                                                                                                                                                                                                    | Adult       | Cultivated cells              |
| 27 | MKPL-1     | +   | -      | -      | -  | -  | Lymphoma | MCL           | t(3;5) <i>RBM6::CSF1R</i> , t(11;14) <i>IGH::CCND1</i>                                                                                                                                                                                                        | Adult       | Cell pellet                   |
| 28 | ML-2       | -   | +      | +      | +  | +  | AML      | M4            | t(6;11) <i>KMT2A::AFDN</i>                                                                                                                                                                                                                                    | Young adult | Cultivated cells              |
| 29 | MOLM-1     | +   | +      | +      | +  | +  | CML      | CML in BC     | t(9;22) <i>BCR-ABL</i>                                                                                                                                                                                                                                        | Adult       | Cultivated cells              |

|    |            |   |   |   |   |   |          |           |                                                                                                               |             |                  |
|----|------------|---|---|---|---|---|----------|-----------|---------------------------------------------------------------------------------------------------------------|-------------|------------------|
| 30 | MOLM-13    | - | + | - | - | - | AML      | M5a       | t(9;11)KMT2A::MLL T3                                                                                          | Young adult | Cell pellet      |
| 31 | MOLM-14    | + | - | - | + | + | AML      | M5        | t(9;11)KMT2A::MLL T3                                                                                          | Young adult | Cultivated cells |
| 32 | MOLM-20    | + | - | - | - | - | CNL      | -         | t(4;11)KMT2A::SEPT11                                                                                          | Adult       | Cell pellet      |
| 33 | MONO-MAC-1 | + | + | - | + | + | AML      | M5        | t(9;11)KMT2A::MLL T3                                                                                          | Adult       | Cultivated cells |
| 34 | MONO-MAC-6 | - | - | - | + | + | AML      | M5        | t(9;11)KMT2A::MLL T3                                                                                          | Adult       | Cultivated cells |
| 35 | MUTZ-2     | + | - | - | - | - | AML      | M2        | No record of fusion transcripts                                                                               | Adult       | Cell pellet      |
| 36 | MUTZ-3     | + | - | - | - | - | AML      | M4        | Inv(17)BPTF::LRRC37A2, Inv(19)RPL36::RPL36P16                                                                 | Young adult | Cell pellet      |
| 37 | MV4-11     | + | + | - | + | + | AML      | M5        | t(9;11)KMT2A::AFF1                                                                                            | Pediatric   | Cultivated cells |
| 38 | NALM-1     | - | + | - | + | + | CML      | CML in BC | t(9;22)BCR-ABL                                                                                                | Pediatric   | Cultivated cells |
| 39 | NB-4       | + | + | + | + | + | AML      | M3        | t(15;17)PML::RARA                                                                                             | Young adult | Cultivated cells |
| 40 | NOMO-1     | + | + | + | + | + | AML      | M5a       | t(9;11)KMT2A::MLL T3                                                                                          | Young adult | Cultivated cells |
| 41 | OCI-AML1   | + | - | - | - | - | AML      | M4        | No record of fusion transcripts                                                                               | Adult       | Cell pellet      |
| 42 | OCI-AML2   | - | - | - | + | + | AML      | M4        | t(6;11)KMT2A::AFDN                                                                                            | Adult       | Cultivated cells |
| 43 | OCI-AML3   | + | - | - | + | + | AML      | M4        | t(12;6)GAPDH::RPS18, t(8;6)NDRG1::RPS18,                                                                      | Adult       | Cultivated cells |
| 44 | OCI-AML4   | - | + | - | - | - | AML      | M4        | Inv(19)LSM14A::ZNF416, t(11;19)KMT2A::MLL T1                                                                  | Young adult | Cell pellet      |
| 45 | OCI-AML5   | + | - | - | - | - | AML      | M4        | t(5;6)RPL37::RPL37P15                                                                                         | Adult       | Cell pellet      |
| 46 | OCI-M1     | + | - | - | - | - | AML      | M6        | t(11;17)DISC1FP1::STX8, Inv(6)KIF13A::TPMT, t(8;17)ANK1::CCDC144NL, t(16;6)ANKRD11::THBS2, Inv(19)PTPRS::ZNR4 | Adult       | Cell pellet      |
| 47 | OCI-M2     | - | + | - | - | - | AML      | M6        | t(21;21)RUNX1::TSPEAR                                                                                         | Adult       | Cell pellet      |
| 48 | REH        | - | - | - | + | + | ALL      | B-ALL     | t(12;21)ETV6::RUNX1                                                                                           | Pediatric   | Cultivated cells |
| 49 | RS4-11     | - | + | - | - | - | ALL      | B-ALL     | t(9;11)KMT2A::AFF1                                                                                            | Young adult | Cell pellet      |
| 50 | SEM        | - | + | - | + | + | ALL      | B-ALL     | t(9;11)KMT2A::AFF1                                                                                            | Pediatric   | Cultivated cells |
| 51 | SET-2      | - | - | - | + | + | AML      | M7        | t(9;9)ADGRE5::NOL6, t(11;7)FTH1::ACTB                                                                         | Adult       | Cultivated cells |
| 52 | SKM-1      | - | + | - | - | - | AML      | M5        | Inv(19)DNMT1::TYK2, t(19;13)SSBP4::NUP58, t(9;15)RPS6::B2M                                                    | Adult       | Cell pellet      |
| 53 | SKNO-1     | + | + | + | - | - | AML      | M2        | t(8;21)RUNX1::RUNX1T1 (AML1-ETO)                                                                              | Young adult | Cell pellet      |
| 54 | TF-1       | + | + | + | - | - | AML      | M6        | t(16;20)CBFA2T3::ABHD12                                                                                       | Young adult | Cell pellet      |
| 55 | THP-1      | + | + | + | + | + | AML      | M5        | t(9;11)KMT2A::MLL T3                                                                                          | Pediatric   | Cultivated cells |
| 56 | U-937      | + | + | + | + | + | Lymphoma | IBL       | t(10;11)MLL T10::PICALM                                                                                       | Adult       | Cultivated cells |
| 57 | UOC-M1     | + | + | + | - | - | AML      | M1        | No record of fusion transcripts                                                                               | Adult       | Cell pellet      |
| 58 | UT-7       | - | - | - | - | - | AML      | M7        | No record of fusion transcripts                                                                               | Adult       | Cell pellet      |
| 59 | YNH-1      | - | + | + | - | - | AML      | M1        | t(16;21)FUS::ERG                                                                                              | Adult       | Cell pellet      |

**Abbreviations.** NGS, next generation sequencing; FC, flow cytometry; FA, fragment-length analysis; mat., material; ALL, acute lymphoblastic leukemia; AML acute myeloblastic leukemia; NHL, non-Hodgkin's lymphoma; CML in B, chronic myeloblastic leukemia in blast crisis; CNL, chronic neutrophilic leukemia; MCL, mantle cell lymphoma; IBL, immunoblastic lymphoma or histiocytic lymphoma; AMKL, acute megakaryocytic leukemia.

<sup>1</sup>Expression of fusion transcripts detected by RT-PCR (DSMZ, The LL-100 Panel, PMID: 31160637) or RNA sequencing (CCLE, DepMap portal). For the RNAseq data, the junction reads of 10 and above are included in this table. For fusions with lower read counts, please refer to CCLE database at: <https://depmap.org/portal/>. <sup>2</sup>Before extracting genomic material from cell cultures all cell lines were validated using STR analysis; <sup>3</sup>Cell pellets were received from DSMZ-German collection of microorganisms and cell culture GmbH (Braunschweig, Germany).

**Table S2. *WT1* and *ABL1* primer pairs and probes used for RT-PCR.**

| Target      | Location | Direction | Primer sequence                         |
|-------------|----------|-----------|-----------------------------------------|
| <i>WT1</i>  | Exon 2   | forward   | 5'-GTTACAGCACGGTCACCTTC-3'              |
|             |          | reverse   | 5'-CCATGGGATCCTCATGCTTG-3'              |
|             |          | probe     | 5'-FAM-GCAGTTCCCCAACCACTCATT-BHQ1-3'    |
| <i>ABL1</i> | Exon 1   | forward   | 5'- GGGTCCCACTGCAATGTTT-3'              |
|             | Exon 2   | reverse   | 5'-CCAACGAGCGGCTTCAC-3'                 |
|             |          | probe     | 5'-FAM-TCAGATGCTACTGGCCGCTGAAGG-BHQ1-3' |

**Table S3. Overview of gene sequenced with TruSight™ myeloid sequencing panel.**

| #  | Gene            | Status in current data set <sup>1</sup> | #  | Gene          | Status in current data set |
|----|-----------------|-----------------------------------------|----|---------------|----------------------------|
| 1  | <i>ABL1</i>     | Wild type                               | 28 | <i>JAK3</i>   | Wild type                  |
| 2  | <i>ASXL1</i>    | Altered                                 | 29 | <i>KDM6A</i>  | Wild type                  |
| 3  | <i>ATRX</i>     | Altered                                 | 30 | <i>KIT</i>    | Altered                    |
| 4  | <i>BCOR</i>     | Altered                                 | 31 | <i>KMT2A</i>  | Wild type                  |
| 5  | <i>BCORL1</i>   | Altered                                 | 32 | <i>KRAS</i>   | Altered                    |
| 6  | <i>BRAF</i>     | Wild type                               | 33 | <i>MPL</i>    | Wild type                  |
| 7  | <i>CALR</i>     | Wild type                               | 34 | <i>MYD88</i>  | Wild type                  |
| 8  | <i>CBL</i>      | Wild type                               | 35 | <i>NOTCH1</i> | Altered                    |
| 9  | <i>CBLB</i>     | Wild type                               | 36 | <i>NPM1</i>   | Altered                    |
| 10 | <i>CBLC</i>     | Wild type                               | 37 | <i>NRAS</i>   | Altered                    |
| 11 | <i>CDKN2A</i>   | Wild type                               | 38 | <i>PDGFRA</i> | Wild type                  |
| 12 | <i>CEBPa</i>    | Altered                                 | 39 | <i>PHF6</i>   | Altered                    |
| 13 | <i>CSF3R</i>    | Altered                                 | 40 | <i>PTEN</i>   | Altered                    |
| 14 | <i>CUX1</i>     | Wild type                               | 41 | <i>PTPN11</i> | Altered                    |
| 15 | <i>DNMT3A</i>   | Altered                                 | 42 | <i>RAD21</i>  | Wild type                  |
| 16 | <i>ETV6/TEL</i> | Altered                                 | 43 | <i>RUNX1</i>  | Altered                    |
| 17 | <i>EZH2</i>     | Altered                                 | 44 | <i>SETBP1</i> | Altered                    |
| 18 | <i>FBXW7</i>    | Wild type                               | 45 | <i>SF3B1</i>  | Altered                    |
| 19 | <i>FLT3</i>     | Altered                                 | 46 | <i>SMC1A</i>  | Wild type                  |
| 20 | <i>Gata1</i>    | Wild type                               | 47 | <i>SMC3</i>   | Wild type                  |
| 21 | <i>GATA2</i>    | Altered                                 | 48 | <i>SRSF2</i>  | Wild type                  |
| 22 | <i>GNAS</i>     | Wild type                               | 49 | <i>STAG2</i>  | Altered                    |
| 23 | <i>HRAS</i>     | Wild type                               | 50 | <i>TET2</i>   | Altered                    |
| 24 | <i>IDH1</i>     | Wild type                               | 51 | <i>TP53</i>   | Altered                    |
| 25 | <i>IDH2</i>     | Wild type                               | 52 | <i>U2AF1</i>  | Altered                    |
| 26 | <i>IKZF1</i>    | Wild type                               | 53 | <i>WT1</i>    | Altered                    |
| 27 | <i>JAK2</i>     | Altered                                 | 54 | <i>ZRSR2</i>  | Wild type                  |

<sup>1</sup>For detailed description on detected alterations in each gene, refer to Table S4.

**Table S4. *WT1* primer pairs and amplification strategies used for Sanger Sequencing.**

| Location                      | #  | Direction | Primer sequence               | Polymerase                  | Amplification Method     |
|-------------------------------|----|-----------|-------------------------------|-----------------------------|--------------------------|
| 5'UTR and its upstream region | 1  | forward   | 5'- ACTAAGTGCTGCTGACTCCA -3'  | Q5® Hot Start High-Fidelity | Touch-down amplification |
|                               |    | reverse   | 5'- TCAGGTAAGCAGTGAGTCCG -3'  |                             |                          |
|                               | 2  | forward   | 5'- GACTGAGTTCTTTCTGCGCT -3'  | Q5® Hot Start High-Fidelity | Touch-down amplification |
|                               |    | reverse   | 5'- TGAACCTCTTACCCCAGCTG -3'  |                             |                          |
|                               | 3  | forward   | 5'- TTGGGTTGAAGAGGAGGGTG -3'  | Q5® Hot Start High-Fidelity | Touch-down amplification |
|                               |    | reverse   | 5'- GGACTCCCTGCTGCTCTG -3'    |                             |                          |
| Exon 1                        | 4  | forward   | 5'- GGACTTCCTCTTGCTGCAGG -3'  | Q5® Hot Start High-Fidelity | Touch-down amplification |
|                               |    | reverse   | 5'- TTGATGAAGGAGTGAGGCGG -3'  |                             |                          |
|                               | 5  | forward   | 5'- GACGTGCGGGACCTGAAC -3'    | Q5® Hot Start High-Fidelity | Touch-down amplification |
|                               |    | reverse   | 5'- TTGGGAAGCAGCTGGGTAAG -3'  |                             |                          |
| Exon 2                        | 6  | forward   | 5'- TCTTCCTGCCGAAAGTCCTG -3'  | ALLin™ Hot Start Taq        | Standard amplification   |
|                               |    | reverse   | 5'- AACGTACTTGGGATGGAGGG -3'  |                             |                          |
| Exon 3                        | 7  | forward   | 5'- GGGGAATGCAAAGTGAGAGG -3'  | ALLin™ Hot Start Taq        | Standard amplification   |
|                               |    | reverse   | 5'- TAGTAGAGTGAGTGCAGGC -3'   |                             |                          |
| Exon 4                        | 8  | forward   | 5'- TGGAAAATGTGGAGGCTTGC -3'  | ALLin™ Hot Start Taq        | Standard amplification   |
|                               |    | reverse   | 5'- ATTTGGATCCCGGACTTTGC -3'  |                             |                          |
| Exon 5                        | 9  | forward   | 5'- TTGAGGGGCTTTTCACTGGA -3'  | ALLin™ Hot Start Taq        | Standard amplification   |
|                               |    | reverse   | 5'- CCATTTTGTCCCCAGCATGT -3'  |                             |                          |
| Exon 6                        | 10 | forward   | 5'- TCTAAAGTGGCCCCATGGAG -3'  | ALLin™ Hot Start Taq        | Standard amplification   |
|                               |    | reverse   | 5'- AAAGGAGCCTGCAGTGAAGA -3'  |                             |                          |
| Exon 7                        | 11 | forward   | 5'- GGAGTGTGAATGGGAGTGGT -3'  | ALLin™ Hot Start Taq        | Standard amplification   |
|                               |    | reverse   | 5'- CAGAAATGCAAAATGGCCCCA -3' |                             |                          |
| Exon 8                        | 12 | forward   | 5'- CCCTGAGCTCCCATTCATTG -3'  | ALLin™ Hot Start Taq        | Standard amplification   |
|                               |    | reverse   | 5'- TGTGGTTTGCAGGGGAAATG -3'  |                             |                          |
| Exon 9                        | 13 | forward   | 5'- TCAGTGATTCTTGTTGGGCC -3'  | ALLin™ Hot Start Taq        | Standard amplification   |
|                               |    | reverse   | 5'- GCACACTCCAGCCATTCTTT -3'  |                             |                          |
| Exon 10                       | 14 | forward   | 5'- TGGTTAGCTCAGGGACAGAA -3'  | ALLin™ Hot Start Taq        | Standard amplification   |
|                               |    | reverse   | 5'- TAGTTTCCAGAAGCACCGGT -3'  |                             |                          |

**Table S5. Overview of genomic alterations detected via NGS.**

| Gene*        | Variant (DNA)     | Variant (AA)        | VF (%) | Read | Cell Line  | dbSNP/COSMIC | Relevance         | Reference            |
|--------------|-------------------|---------------------|--------|------|------------|--------------|-------------------|----------------------|
| <b>TP53</b>  | c.817C>T          | p.Arg273Cys         | 99.55  | 224  | CTS        | rs121913343  | Pathogenic        | ClinVar <sup>1</sup> |
|              | c.31G>C           | p.Glu11Gln          | 57.36  | 652  | FKH-1      | rs201382018  | VUS               | ClinVar              |
|              | c.711G>A          | p.Met237Ile         | 100,00 | 968  | GF-D8      | rs587782664  | Pathogenic        | ClinVar              |
|              | c.700T>G          | p.Tyr234Asp         | 99,79  | 2874 | KASUMI-6   | rs864622237  | Likely pathogenic | ClinVar              |
|              | c.814G>A          | p.Val272Met         | 99.79  | 481  | KMOE-2     | rs121912657  | Pathogenic        | ClinVar              |
|              | c.905_919+32del47 | intronic variant    | 96.42  | 642  | ME-1       | ACH-000439   | VUS               | CCLE                 |
|              | c.637C>T          | p.Arg213Ter         | 54.13  | 351  | MKPL-1     | rs397516436  | Pathogenic        | ClinVar              |
|              | c.517G>A          | p.Val173Met         | 49.02  | 2473 | MOLM-16    | rs876660754  | Pathogenic        | ClinVar              |
|              | c.713G>C          | p.Cys238Ser         | 48.73  | 2473 | MOLM-16    | rs730882005  | Likely pathogenic | ClinVar              |
|              | c.742C>T          | p.Arg248Trp         | 99.38  | 5182 | MV4-11     | rs121912651  | Pathogenic        | ClinVar              |
|              | c.743G>A          | p.Arg248Gln         | 99.11  | 1353 | NB-4       | rs11540652   | Pathogenic        | ClinVar              |
|              | c.723delC         | p.Cys242AlafsTer5   | 98.55  | 3368 | NOMO-1     | rs730882019  | Pathogenic        | ClinVar              |
|              | c.434T>G          | p.Leu145Arg         | 47.21  | 754  | OCI-M1     | rs587782197  | Likely pathogenic | ClinVar              |
|              | c.743G>A          | p.Arg248Gln         | 99.1   | 2449 | SKNO-1     | rs11540652   | Pathogenic        | ClinVar              |
|              | c.520_545del26    | p.Arg174LeufsTer3   | 90.5   | 968  | THP-1      | COSM13483    | Pathogenic        | COSMIC <sup>2</sup>  |
|              | c.559+1G>A        | intronic variant    | 99.12  | 340  | U-937      | rs1131691042 | Likely pathogenic | ClinVar              |
| <b>ASXL1</b> | c.1773C>A         | p.Tyr591Ter         | 32.81  | 1262 | K-562      | rs371369583  | Pathogenic        | ClinVar              |
|              | c.3692C>T         | p.Ser1231Phe        | 67.9   | 5560 | ME-1       | rs74638057   | Benign            | ClinVar              |
|              | c.1954G>A         | p.Gly652Ser         | 55.08  | 325  | MKPL-1     | rs3746609    | Benign            | ClinVar              |
|              | c.1954G>A         | p.Gly652Ser         | 57.55  | 351  | MOLM-16    | rs3746609    | Benign            | ClinVar              |
|              | c.1773C>A         | p.Tyr591Ter         | 54.06  | 1613 | MOLM-20    | rs371369583  | Pathogenic        | ClinVar              |
|              | c.3692C>T         | p.Ser1231Phe        | 49.33  | 3430 | MOLM-20    | rs74638057   | Benign            | ClinVar              |
|              | c.4178_4179delTG  | p.Leu1393ArgfsTer30 | 40.71  | 280  | MONO-MAC-1 | ACH-001129   | Pathogenic        | CCLE                 |
|              | c.3306G>T         | p.Glu1102Asp        | 31.76  | 2371 | MUTZ-3     | rs139115934  | Benign            | ClinVar              |
|              | c.2077C>T         | p.Arg693Ter         | 49.11  | 902  | NOMO-1     | rs373221034  | Pathogenic        | ClinVar              |
|              | c.1773C>G         | p.Tyr591Ter         | 52.5   | 2162 | OCI-AML5   | rs371369583  | Pathogenic        | ClinVar              |
| <b>NRAS</b>  | c.38G>T           | p.Gly13Val          | 48.46  | 1950 | AML-193    | rs121434596  | Likely pathogenic | ClinVar              |
|              | c.38G>A           | p.Gly13Asp          | 55.67  | 1076 | GF-D8      | rs121434596  | Likely pathogenic | ClinVar              |
|              | c.182A>G          | p.Gln61Arg          | 52.63  | 1520 | KMOE-2     | rs11554290   | Likely pathogenic | ClinVar              |



|                        |                   |                                                      |        |      |            |              |                   |                   |
|------------------------|-------------------|------------------------------------------------------|--------|------|------------|--------------|-------------------|-------------------|
|                        | c.181C>A          | p.Gln61Lys                                           | 33.39  | 620  | M-07e      | rs121913254  | Likely pathogenic | ClinVar           |
|                        | c.183A>T          | p.Gln61His                                           | 45.18  | 1007 | ME-1       | rs121913255  | Likely pathogenic | ClinVar           |
|                        | c.35G>A           | p.Gly12Asp                                           | 51.77  | 1949 | MOLM-20    | rs121913237  | Likely pathogenic | ClinVar           |
|                        | c.182A>T          | p.Gln61Leu                                           | 100.00 | 468  | OCI-AML3   | rs11554290   | Likely pathogenic | ClinVar           |
|                        | c.35G>A           | p.Gly12Asp                                           | 78.57  | 3145 | THP-1      | rs121913237  | Likely pathogenic | ClinVar           |
| <b>EZH2</b>            | c.2215_2219del5   | p.Leu739ValfsTer22                                   | 49.88  | 1269 | AML-193    | NA           | Pathogenic        | Current data set  |
|                        | c.1856T>C         | p.Leu619Pro                                          | 23.82  | 722  | K-562      | ND           | VUS               | Current data set  |
|                        | c.892C>A          | p.Arg298Ser                                          | 69.4   | 794  | KG-1a      | ND           | VUS               | Current data set  |
|                        | c.1851G>T         | p.Lys617Asn                                          | 99.1   | 1224 | OCI-AML1   | ND           | VUS               | Current data set  |
|                        | c.2069G>A         | p.Arg690His                                          | 98.33  | 5255 | OCI-AML5   | rs1554481435 | Likely pathogenic | ClinVar           |
| <b>KRAS</b>            | c.182A>G          | p.Gln61Arg                                           | 43.96  | 414  | CTS        | rs121913240  | Pathogenic        | ClinVar           |
|                        | c.35G>T           | p.Gly12Val                                           | 45.06  | 2630 | MUTZ-2     | rs121913529  | Pathogenic        | ClinVar           |
|                        | c.29_31dupGAG     | p.Gly10dup                                           | 29.03  | 2253 | MUTZ-3     | COSM12654    | VUS               | COSMIC            |
|                        | c.53C>A           | p.Ala18Asp                                           | 71.95  | 1843 | NB-4       | COSM542      | VUS               | COSMIC            |
|                        | c.38G>A(v)        | p.Gly13Asp                                           | 53.85  | 2951 | NOMO-1     | rs112445441  | Pathogenic        | ClinVar           |
| <b>FLT3 exon 14/15</b> | c.1669G>A         | p.Val557Ile                                          | 99.49  | 2746 | KG-1       | rs35958982   | Benign            | ClinVar           |
|                        | c.1669G>A         | p.Val557Ile                                          | 99.5   | 1210 | KG-1a      | rs35958982   | Benign            | ClinVar           |
|                        | c.1772_1801dup30  | p.Leu601_Lys601ins<br>HisValAspPheArgGluTyrGluTyrAsp | 76.81  | 2204 | MV4-11     | COSM27908    | Pathogenic        | COSMIC            |
|                        | c.1775_1795dup21  | p.Tyr599_Asp599ins<br>PheAspPheArgGluTyrGlu          | 53.4   | 1811 | MOLM-14    | COSM19953    | Pathogenic        | COSMIC            |
|                        | c.1775T>C         | p.Val592Ala                                          | 67.19  | 1286 | MONO-MAC-1 | rs1057520025 | Likely pathogenic | ClinVar           |
| <b>FLT3 exon 20</b>    | c.2459C>A         | p.Thr820Asn                                          | 61.65  | 4621 | KMOE-2     | COSM2070126  | VUS               | COSMIC            |
|                        | c.2459C>A         | p.Thr820Asn                                          | 49.6   | 3101 | ME-1       | rs554971395  | VUS               | ClinVar           |
| <b>RUNX1</b>           | c.419_420delAC    | p.Tyr140PhefsTer3                                    | 51.67  | 658  | HT-93      | NA           | Pathogenic        | Current data set  |
|                        | c.401C>T          | p.Ala134Val                                          | 42.78  | 1052 | MONO-MAC-1 | ACH-001129   | VUS               | CCLE <sup>3</sup> |
|                        | c.610C>T          | p.Arg204Ter                                          | 48.96  | 1342 | MUTZ-2     | rs1569061768 | Pathogenic        | ClinVar           |
|                        | c.438_442dupTGCTA | p.Thr148MetfsTer6                                    | 48.35  | 4705 | OCI-AML5   | COSM2844337  | Pathogenic        | COSMIC            |
| <b>TET2</b>            | c.558delG         | p.Ser189ValfsTer18                                   | 50.73  | 4481 | MOLM-20    | NA           | Pathogenic        | Current data set  |
|                        | c.3061_3062insA   | p.Ser1023GluTer4                                     | 48.33  | 1854 | MOLM-20    | NA           | Pathogenic        | Current data set  |
|                        | c.4161C>G         | p.Asn1387Lys                                         | 16.89  | 876  | MUTZ-3     | ND           | VUS               | Current data set  |
|                        | c.4541_4542delTT  | p.Leu1515AlafsTer62                                  | 24.43  | 839  | MUTZ-3     | NA           | Pathogenic        | Current data set  |
|                        | c.3646C>T         | p.Arg1216Ter                                         | 49.9   | 1038 | OCI-AML1   | COSV54398925 | Pathogenic        | COSMIC            |
|                        | c.3009G>A         | p.Trp1003Ter                                         | 51.26  | 1746 | OCI-AML1   | COSV54426154 | Pathogenic        | COSMIC            |

|                  |                           |                     |       |      |            |              |                        |                  |
|------------------|---------------------------|---------------------|-------|------|------------|--------------|------------------------|------------------|
|                  | c.2474C>A                 | p.Ser825Ter         | 53.36 | 7953 | OCI-AML5   | COSM2952770  | Pathogenic             | COSMIC           |
| <b>WT1</b>       | c.1202_1203delGA          | p.Arg401IlefsTer3   | 49.33 | 673  | CTS        | NA           | Pathogenic             | PMID 18591546    |
|                  | c.1202_1203delGA          | p.Arg401IlefsTer3   | 44.92 | 2400 | KASUMI-6   | ACH-000166   | Pathogenic             | CCLE             |
|                  | c.1105C>T                 | p.Arg369Ter         | 43.11 | 392  | U-937      | rs1423753702 | Pathogenic             | ClinVar          |
|                  | c.1385G>A                 | p.Arg462Gln         | 37.5  | 2878 | MOLM-1     | ACH-001573   | Likely pathogenic      | CCLE             |
| <b>BCOR</b>      | c.4988G>A                 | p.Trp1663Ter        | 99.42 | 688  | KG-1       | ND           | Pathogenic             | Current data set |
|                  | c.871_895del25            | p.Met291LeufsTer    | 95.75 | 471  | MOLM-14    | NA           | Pathogenic             | Current data set |
|                  | c.3694C>T                 | p.Gln1232Ter        | 99.35 | 461  | MUTZ-2     | ND           | Pathogenic             | Current data set |
| <b>GATA2</b>     | c.344_351delCCTGGACC      | p.Pro115ArgfsTer67  | 33.09 | 556  | M-07e      | NA           | Pathogenic             | CCLE             |
|                  | c.919C>T                  | p.Arg307Trp         | 35.79 | 2515 | MUTZ-3     | COSM306052   | VUS                    | COSMIC           |
| <b>BCORL1</b>    | c.2350C>T                 | p.Arg784Ter         | 65.31 | 516  | AML-193    | COSM1319521  | Pathogenic             | COSMIC           |
|                  | c.4258C>T                 | p.Arg1420Ter        | 98.1  | 263  | MUTZ-2     | COSM5880048  | Pathogenic             | COSMIC           |
| <b>CEBPa</b>     | c.917G>C                  | p.Arg306Pro         | 48.07 | 1712 | KASUMI-6   | ACH-000166   | VUS                    | CCLE             |
|                  | c.584_589dupACCCGC        | p.His195_Pro196dup  | 23.26 | 331  | THP-1      | NA           | VUS                    | Current data set |
| <b>DNMT3A</b>    | c.2462A>G                 | p.His821Arg         | 14.23 | 1286 | MUTZ-3     | ND           | VUS                    | Current data set |
|                  | c.2516C>G                 | p.Ser839Cys         | 13.53 | 4309 | MUTZ-3     | ND           | VUS                    | Current data set |
|                  | c.2644C>T                 | p.Arg882Cys         | 60.22 | 465  | OCI-AML3   | rs377577594  | Pathogenic             | ClinVar          |
| <b>NOTCH1</b>    | c.7327_7328insGGAAGAGGATG | p.Val2443GlyfsTer38 | 60.78 |      | AML-193    | ACH-000557   | Pathogenic             | CCLE             |
|                  | c.6454G>C                 | p.Gly2152Arg        | 41.58 | 1253 | OCI-AML5   | rs116317506  | Benign                 | ClinVar          |
| <b>NPM1</b>      | c.859_860insTCTG          | p.Trp288CysfsTer12  | 12.24 | 2459 | MUTZ-3     | rs587776806  | Pathogenic             | ClinVar          |
|                  | c.860_863dupTCTG          | p.Trp288CysfsTer12  | 52.89 | 743  | OCI-AML3   | rs587776806  | Pathogenic             | ClinVar          |
| <b>STAG2</b>     | c.3308G>A                 | p.Trp1103Ter        | 99.44 | 1440 | KASUMI-6   | ACH-000166   | Pathogenic             | CCLE             |
|                  | c.2009delA                | p.Asp671IlefsTer21  | 96.05 | 532  | MUTZ-2     | NA           | Pathogenic             | Current data set |
| <b>ATRX</b>      | c.5823_5825delTAG         | p.Ser1942del        | 60.37 | 1986 | MOLM-20    | NA           | VUS                    | Current data set |
| <b>CSF3R</b>     | c.1853C>T                 | p.Thr618Ile         | 43.3  | 224  | MOLM-20    | rs796065343  | Likely pathogenic      | ClinVar          |
| <b>ETV6 /TEL</b> | c.1058G>C                 | p.Arg353Pro         | 49.07 | 2360 | AML-193    | ACH-000557   | VUS                    | CCLE             |
| <b>JAK2</b>      | c.1849G>T                 | p.Val617Phe         | 99.62 | 6287 | HEL        | rs77375493   | Pathogenic             | ClinVar          |
| <b>KIT</b>       | c.2466T>A                 | p.Asn822Lys         | 98.82 | 1526 | SKNO-1     | rs121913514  | Pathogenic             | ClinVar          |
| <b>PHF6</b>      | c.618_619insGGGA          | p.Asp207GlyfsTer6   | 59.46 | 624  | AML-193    | ACH-000557   | Pathogenic             | CCLE             |
| <b>PTEN</b>      | c.387_388insCGCC          | p.Thr131ProfsTer50  | 96.17 | 287  | U-937      | rs121909224  | Pathogenic             | ClinVar          |
| <b>PTPN11</b>    | c.178G>C                  | p.Gly60Arg          | 46.54 | 838  | U-937      | rs397507507  | Uncertain significance | ClinVar          |
| <b>SETBP1</b>    | c.2602G>A                 | p.Asp868Asn         | 52.8  | 1053 | MOLM-20    | rs267607042  | Pathogenic             | ClinVar          |
| <b>SF3B1</b>     | c.1998G>T                 | p.Lys666Asn         | 34.78 | 851  | MUTZ-3     | rs377023736  | Likely pathogenic      | ClinVar          |
| <b>U2AF1</b>     | c.470A>C                  | p.Gln157Pro         | 47.52 | 322  | MONO-MAC-1 | rs371246226  | Likely pathogenic      | ClinVar          |

**Abbreviations.** AA, amino acid sequence; VF, variant frequency; ins, insertion; del, deletion; dup, duplication; Ter, termination codon; VUS, variant of unknown significance; CCLE, cancer cell line encyclopedia.

\*Transcript IDs used for the analysis: *TP53*, NM\_000546.5; *ASXL1*, NM\_015338.5; *NRAS*, NM\_002524.4; *EZH2*, NM\_004456.4; *KRAS*, NM\_033360.2; *FLT3*, NM\_004119.2; *RUNX1*, NM\_001754.4; *TET2*, NM\_001127208.2; *WT1*, NM\_024426.4; *BCOR*, NM\_001123385.1; *GATA2*, NM\_032638.4; *BCORL1*, NM\_021946.4; *CEBPa*, NM\_004364.3; *DNMT3A*, NM\_022552.4; *NOTCH1*, NM\_017617.3; *NPM1*, NM\_002520.6; *STAG2*, NM\_001042749.1; *ATR*, NM\_000489.3; *CSF3R*, NM\_156039.3; *ETV6/TEL*, NM\_001987.4; *JAK2*, NM\_004972.3; *KIT*, NM\_000222.2; *PHF6*, NM\_032458.2; *PTEN*, NM\_000314.4; *PTPN11*, NM\_002834.3; *SETBP1*, NM\_015559.2; *SF3B1*, NM\_012433.2; *U2AF1*, NM\_001025203.1.

<sup>1</sup>ClinVar database accessed at <https://www.ncbi.nlm.nih.gov/clinvar>; <sup>2</sup>COSMIC database accessed at <https://cancer.sanger.ac.uk/cosmic>; CCLE database accessed at <https://depmap.org>.

**Table S6. Overview of patient characteristics and genomic background.**

| P# | Gender | Age | Blast (%) <sup>1</sup> | Diagnosis | Karyotype                                                                                         | Co-occurring Genetic Mutations |            |             |             |
|----|--------|-----|------------------------|-----------|---------------------------------------------------------------------------------------------------|--------------------------------|------------|-------------|-------------|
|    |        |     |                        |           |                                                                                                   | <i>FLT3</i> -ITD               | <i>KIT</i> | <i>NPM1</i> | <i>nRAS</i> |
| 1  | m      | 14  | 88.5                   | AML M1    | 46,XY,t(1;2)(p35;p22)[14]/46,XY[2]                                                                | Yes                            | No         | No          | No          |
| 2  | f      | 5   | 91                     | AML M4    | 46,XX,add(2)(q?34)[14]/46,XX[6]                                                                   | No                             | No         | No          | No          |
| 3  | f      | 11  | 95                     | AML M1    | 46,XX[25]                                                                                         | No                             | No         | No          | No          |
| 4  | f      | 12  | 41                     | AML M4    | 46,XX[25]                                                                                         | No                             | No         | No          | No          |
| 5  | f      | 3   | 55                     | AML M1    | 46,XX[15]                                                                                         | No                             | No         | No          | No          |
| 6  | f      | 9   | 91                     | AML       | 46,XX,t(5;11)(q35;p15)[20]                                                                        | Yes                            | No         | No          | No          |
| 7  | m      | 8   | 93                     | AML M1    | 46,XY,der(14)t(14;17)(p11;q21)[7]/46,idem,del(3)(q13q26)[1]/47,idem,del(3)(q13q26),+4[1]/46,XY[9] | No                             | No         | No          | No          |
| 8  | f      | 12  | 90                     | AML M1/M2 | 46,XX[25]                                                                                         | Yes                            | No         | No          | No          |
| 9  | m      | 13  | 95                     | AML M1    | 46,XY,del(9)(q11q?33)[17]/46,XY[3]                                                                | No                             | No         | No          | No          |
| 10 | m      | 5   | 51                     | AML M5    | 46,XY[25]                                                                                         | Yes                            | No         | No          | No          |
| 11 | m      | 8   | 78                     | AML M2/M4 | 46,XY,add(11)(q23),inc                                                                            | No                             | No         | No          | No          |
| 12 | f      | 1   | 37                     | AML M4    | 46,XX,inv(16)(p13q22)                                                                             | No                             | No         | No          | Yes         |
| 13 | m      | 17  | 76                     | AML M2    | 46,XY[12]                                                                                         | Yes                            | No         | No          | No          |
| 14 | m      | 17  | 35                     | AML M5    | 46,XY[25]                                                                                         | Yes                            | No         | Yes         | No          |
| 15 | f      | 16  | 79                     | AML M4    | 45,XX,inv(3)(q21q26),-7[25]/46,XX[1]                                                              | No                             | No         | No          | No          |
| 16 | m      | 14  | 84                     | AML M0    | 46,XY,add(2)(p14),add(4)(q,26),der(8)t(8;12)(p12;q12),-12,add(16)(q21),+17[15]/46,XY[5]           | No                             | Yes        | No          | No          |
| 17 | m      | 16  | 67                     | AML M1    | 45,XY,-7[20]                                                                                      | No                             | No         | Yes         | Yes         |
| 18 | m      | 14  | 86                     | AML M4    | 46,XY[15]                                                                                         | Yes                            | No         | Yes         | No          |
| 19 | m      | 14  | 66                     | AML M4eo  | 46,XY[25]                                                                                         | Yes                            | No         | No          | No          |
| 20 | m      | 5   | 33                     | AML M2    | 46,XY[20]                                                                                         | No                             | No         | No          | No          |
| 21 | m      | 9   | 57                     | AML M4    | 47,XY,+8,t(16;16)(p13;q22)[13]/48,idem,+22[2]                                                     | No                             | Yes        | No          | Yes         |
| 22 | m      | 9   | 62                     | AML M1/M2 | 47,XY,+8[7]/46,XY[11]                                                                             | Yes                            | No         | No          | No          |
| 23 | f      | 16  | 90                     | AML M0    | 54,XX,+4,+8,+13,+18,+19,+20,+21,+22[16]/46,XX[4]                                                  | No                             | No         | No          | No          |
| 24 | m      | 6   | 88                     | AML M1/M2 | 46,XY[25]                                                                                         | Yes                            | No         | No          | No          |

**Abbreviations.** P#, patient number; m, male; f, female. <sup>1</sup>Percentage of bone marrow malignant blasts at the time of diagnosis.
